# Supplementary material for: Molecular evidence for sediment nitrogen fixation in a temperate New England estuary
Source: PubMed Central journal article supplement (PMC4788212; doi:10.7717/peerj.1615), 2016-01-25
Supplement: peerj-04-1615-s001.pdf [file peerj-04-1615-s001.pdf]

| Sample sequence        | Site | .OTU | Accession Number | % Pairwise Identity | Organism                     | Author                        |
|------------------------|------|------|------------------|---------------------|------------------------------|-------------------------------|
| MP11OctnifH-11-61_A07  | MP   | 17   | GQ289582         | 89                  | Bradyrhizobium japonicum     |                               |
| MP11OctnifH-12-61_B07  | MP   | 17   | GQ289582         | 89.1                | Bradyrhizobium japonicum     |                               |
| MP11OctnifH-13-61_C07  | MP   | 22   | KJ021873         | 0.9                 | Marinobacterium lutimaris    |                               |
| MP11OctnifH-14-61_D07  | MP   | 25   | FR669144         | 89.7                | Pseudomonas stutzeri         |                               |
| MP11OctnifH-15-61_E07  | MP   | 17   | GQ289583         | 89.6                | Bradyrhizobium japonicum     |                               |
| MP11OctnifH-16-61_F07  | MP   | 22   | FR669144         | 94.6                | Pseudomonas stutzeri         |                               |
| MP11OctnifH-17-61_G07  | MP   | 25   | FR669144         | 94.6                | Pseudomonas stutzeri         |                               |
| MP11OctnifH-18-61_H07  | MP   | 22   | FR669144         | 94.6                | Pseudomonas stutzeri         |                               |
| MP11OctnifH-20-61_B08  | MP   | 25   | FR669144         | 94.6                | Pseudomonas stutzeri         |                               |
| MP11OctnifH-21-61_C08  | MP   | 25   | HM601490         | 95                  | Florida Bay                  | Olson and Lesser, unpublished |
| MP11OctnifH-22-61_D08  | MP   | 22   | FR669144         | 94.6                | Pseudomonas stutzeri         |                               |
| MP11OctnifH-24-61_F08  | MP   | 25   | HM601490         | 90.1                | Florida Bay                  | Olson and Lesser, unpublished |
| MP11OctnifH-25-61_G08  | MP   | 22   | FR669144         | 94.6                | Pseudomonas stutzeri         |                               |
| MP11OctnifH-26-61_H08  | MP   | 22   | FR669144         | 94.6                | Pseudomonas stutzeri         |                               |
| MP11OctnifH-27-61_E06  | MP   | 17   | GQ289582         | 89.6                | Bradyrhizobium japonicum     |                               |
| MP11OctnifH-28-61_F06  | MP   | 17   | GQ289582         | 78.1                | Bradyrhizobium japonicum     |                               |
| MP11OctnifH-29-61_G06  | MP   | 17   | GQ289582         | 89.6                | Bradyrhizobium japonicum     |                               |
| MP11OctnifH-30-61_H06  | MP   | 17   | GQ289582         | 89.2                | Bradyrhizobium japonicum     |                               |
| MP18-11Oct_0412A       | MP   | 41   | HQ606017         | 99.7                | Mediterranean Sea            | Yogev et al. 2011 et al.      |
| MP18-11Oct_0412B       | MP   | 41   | KF182367         | 99.3                | Sphingomonas paucimobilis    |                               |
| MP18-11Oct_0412C       | MP   | 41   | KF182367         | 99.3                | Sphingomonas paucimobilis    |                               |
| MP18-11Oct_0614A       | MP   | 84   | DQ177000         | 83.7                | Mangrove roots               | Flores-Mirales et al. 2007    |
| MP18-11Oct_0614B       | MP   | 20   | KF846744         | 94.4                | soil                         | Berthrong et al 2014          |
| MP18-11Oct_0614C       | MP   | 20   | KF846744         | 94.4                | soil                         | Berthrong et al 2014          |
| MP18-11Oct_0614D       | MP   | 20   | DQ177021         | 89.2                | Mangrove roots               | Flores-Mirales et al. 2007    |
| MP18-11Oct_0614E       | MP   | 20   | DQ176983         | 89.2                | Mangrove roots               | Flores-Mirales et al. 2007    |
| MP18-11Oct_0614F       | MP   | 20   | CP003154         | 88.6                | Thiocystis violascens        |                               |
| MP18-11Oct_0614G       | MP   | 20   | CP003154         | 93.3                | Thiocystis violascens        |                               |
| MP24AugnifH-38-432_A08 | MP   | 23   | AY912772         | 88                  | forest                       | Rösch & Bothe 2009            |
| MP24AugnifH-39-432_B08 | MP   | 7    | AY912772         | 88                  | forest                       | Rösch & Bothe 2009            |
| MP24AugnifH-40-432_C08 | MP   | 7    | AY912772         | 88                  | forest                       | Rösch & Bothe 2009            |
| MP24AugnifH-41-432_D08 | MP   | 7    | AY912562         | 93.3                | forest                       | Rösch & Bothe 2009            |
| MP24AugnifH-42-432_E08 | MP   | 15   | EU693341         | 93.6                | Acinetobacter sp. Z21        |                               |
| MP24AugnifH-43-432_F08 | MP   | 15   | EU693341         | 93.3                | Acinetobacter sp. Z21        |                               |
| MP24AugnifH-44-432_G08 | MP   | 15   | FJ822995         | 93.5                | Agrobacterium tumefaciens    |                               |
| MP24AugnifH-45-432_H08 | MP   | 15   | FJ822995         | 93.5                | Agrobacterium tumefaciens    |                               |
| MP24AugnifH-46-432_A09 | MP   | 15   | FJ822995         | 87.5                | Agrobacterium tumefaciens    |                               |
| MP24AugnifH-47-432_B09 | MP   | 21   | AF216883         | 91.4                | Azomonas agilis              |                               |
| MP24AugnifH-48-432_C09 | MP   | 7    | AY912772         | 93.9                | forest                       | Rösch & Bothe 2009            |
| MP24AugnifH-49-432_D09 | MP   | 15   | EU693341         | 93.3                | Acinetobacter sp. Z21        |                               |
| MP24AugnifH-50-432_E09 | MP   | 7    | AY912562         | 87.5                | forest                       | Rösch & Bothe 2009            |
| MP24AugnifH-51-432_F09 | MP   | 21   | FJ822995         | 93.5                | Agrobacterium tumefaciens    |                               |
| MP24AugnifH-52-432_G09 | MP   | 7    | AY912772         | 88                  | forest                       | Rösch & Bothe 2009            |
| MP24AugnifH-53-432_H09 | MP   | 23   | AY912772         | 88.2                | forest                       | Rösch & Bothe 2009            |
| MP24AugnifH-54-432_A10 | MP   | 7    | AY912772         | 87.8                | forest                       | Rösch & Bothe 2009            |
| MP24AugnifH-55-432_B10 | MP   | 23   | AY912566         | 93.3                | forest                       | Rösch & Bothe 2009            |
| MP24AugnifH-56-432_C10 | MP   | 15   | EU693341         | 93.8                | Acinetobacter sp. Z21        |                               |
| MP24AugnifH-57-432_D10 | MP   | 7    | AY912772         | 87.8                | forest                       | Rösch & Bothe 2009            |
| MP24AugnifH-58-432_E10 | MP   | 21   | EU693341         | 88                  | Acinetobacter sp. Z21        |                               |
| MP24AugnifH-59-432_F10 | MP   | 21   | AF216883         | 91.4                | Azomonas agilis              |                               |
| MP24AugnifH-60-432_G10 | MP   | 7    | AY724202         | 93.3                | forest                       | Rösch & Bothe 2009            |
| MP24AugnifH-61-432_H10 | MP   | 7    | AY912562         | 87.2                | forest                       | Rösch & Bothe 2009            |
| MP24AugnifH-62-432_A11 | MP   | 21   | AF216883         | 89.6                | Azomonas agilis              |                               |
| MP24AugnifH-7-432_C10  | MP   | 23   | AY912772         | 88                  | forest                       | Rösch & Bothe 2009            |
| MP24AugnifH-8-432_D10  | MP   | 23   | AY912772         | 87.2                | forest                       | Rösch & Bothe 2009            |
| MP24AugnifH-9-432_E10  | MP   | 21   | FJ822995         | 93.6                | Agrobacterium tumefaciens    |                               |
| MP7-11Oct_0625A        | MP   | 84   | KF861243         | 0.847               | soil                         | Berthrong et al 2014          |
| MP7-11Oct_0625B        | MP   | 80   | EU594035         | 84                  | marine sponges               | Mohamed et al. 2008           |
| MP7-11Oct_0625C        | MP   | 83   | HQ455977         | 88.1                | South China Sea              | Wu et al., unpublished        |
| MP7-11Oct_0625D        | MP   | 42   | JN645336         | 94.8                | Narragansett Bay             | Fulweiler et al. 2013         |
| MP7-11Oct_0625E        | MP   | 81   | KF847143         | 0.849               | soil                         | Berthrong et al 2014          |
| MP7-11Oct_0625F        | MP   | 42   | JN645336         | 92.4                | Narragansett Bay             | Fulweiler et al. 2013         |
| MP7-11Oct_0703A        | MP   | 37   | AY603957         | 90.6                | Clostridium pasteurianum     |                               |
| MP7-11Oct_0703B        | MP   | 37   | CP000721         | 82.4                | Clostridium beijerinckii     |                               |
| MP7-11Oct_0703C        | MP   | 37   | AY603957         | 81.2                | Clostridium pasteurianum     |                               |
| MP7-11Oct_0703D        | MP   | 82   | KF657141         | 92.9                | Coral                        | Santos, unpublished           |
| SB1-11Oct_0625A        | SB   | 4    | GU193560         | 92.8                | intertidal microbial mat     | Severin & Stal 2010           |
| SB1-11Oct_0625B        | SB   | 4    | GU193560         | 90                  | Desulfobulbus propionicus    |                               |
| SB1-11Oct_0625C        | SB   | 4    | GU193539         | 90.3                | Desulfobulbus propionicus    |                               |
| SB1-11Oct_0625D        | SB   | 4    | JN645436         | 89.7                | Desulfurivibrio alkaliphilus |                               |
| SB1-11Oct_0625E        | SB   | 11   | JN645436         | 90                  | Desulfobulbus propionicus    |                               |
| SB1-11Oct_0625F        | SB   | 4    | GU193539         | 90.2                | Desulfobulbus propionicus    |                               |
| SB1-11Oct_0625G        | SB   | 4    | GU193577         | 90.1                | Desulfurivibrio alkaliphilus |                               |
| SB1-11Oct_0625H        | SB   | 4    | GU193577         | 89.7                | Desulfurivibrio alkaliphilus |                               |
| SB1-11Oct_0703A        | SB   | 4    | GU193539         | 89.7                | Desulfurivibrio alkaliphilus |                               |
| SB1-11Oct_0703C        | SB   | 4    | GU193546         | 89.6                | Desulfurivibrio alkaliphilus |                               |

|                          |    |    |          |       |                                   |                                |
|--------------------------|----|----|----------|-------|-----------------------------------|--------------------------------|
| SB1-11Oct_0703D          | SB | 4  | GU193560 | 89.6  | Desulfurivibrio alkaliphilus      |                                |
| SB1-11Oct_0703E          | SB | 4  | GU193539 | 89.9  | Desulfurivibrio alkaliphilus      |                                |
| SB11Oct_OcmniH-0-19      | SB | 46 | GU193806 | 91    | intertidal microbial mat          | Severin & Stal 2010            |
| SB11Oct_OcmniH-1-46_A12  | SB | 40 | GU193810 | 93    | intertidal microbial mat          | Severin & Stal 2010            |
| SB11Oct_OcmniH-1-19_E06  | SB | 78 | FJ686500 | 99.2  | Jiaozhou Bay, China               | Dang et al. 2013               |
| SB11Oct_OcmniH-2-46_B12  | SB | 44 | KF847070 | 0.852 | soil                              | Berthrong et al 2014           |
| SB11Oct_OcmniH-2-19_F06  | SB | 46 | GU193806 | 82.7  | intertidal microbial mat          | Severin & Stal 2010            |
| SB11Oct_OcmniH-3-46_C12  | SB | 47 | GU193092 | 88.6  | intertidal microbial mat          | Severin & Stal 2010            |
| SB11Oct_OcmniH-3-19_G06  | SB | 48 | HM601536 | 83.6  | Florida Bay                       | Olson and Lesser, unpublished  |
| SB11Oct_OcmniH-4-46_D12  | SB | 47 | GU193092 | 94.5  | intertidal microbial mat          | Severin & Stal 2010            |
| SB11Oct_OcmniH-4-19_H06  | SB | 48 | HM601541 | 83.6  | Florida Bay                       | Olson and Lesser, unpublished  |
| SB11Oct_OcmniH-44-46_B01 | SB | 53 | FR695864 | 89    | Enrich. culture Desulfobacterium  | Bergmann et al., 2011          |
| SB11Oct_OcmniH-45-46_C01 | SB | 76 | JN638626 | 88.7  | Black Sea                         | Kirkpatrick et al, unpublished |
| SB11Oct_OcmniH-5-46_E12  | SB | 50 | GQ441615 | 88.4  | intertidal microbial mat          | Severin & Stal 2010            |
| SB11Oct_OcmniH-6-46_F12  | SB | 77 | KF846880 | 85.1  | soil                              | Berthrong et al. 2014          |
| SB11Oct_OcmniH-7-46_G12  | SB | 50 | GU193092 | 94.4  | intertidal microbial mat          | Severin & Stal 2010            |
| SB24AugniH-1-461_A12-1   | SB | 75 | DQ176992 | 90.1  | Narragansett Bay                  | Brown & Jenkins 2014           |
| SB24AugniH-1-474_A12-2   | SB | 12 | KF285383 | 89    | Desulfovibrio magneticus          |                                |
| SB24AugniH-10-469_B12    | SB | 51 | HQ455892 | 93.1  | South China Sea                   | Kong et al., 2011              |
| SB24AugniH-11-469_C12    | SB | 68 | KF813035 | 93.9  | Chesapeake Bay                    | Zhang et al., unpublished      |
| SB24AugniH-12-469_D12    | SB | 33 | KF854518 | 95.2  | soil                              | Berthrong et al. 2014          |
| SB24AugniH-13-469_E12    | SB | 33 | KF854518 | 95.4  | soil                              | Berthrong et al. 2014          |
| SB24AugniH-14-469_F12    | SB | 67 | EF568535 | 89.7  | Mediterranean Sea                 | Yogev et al. 2011 et al.       |
| SB24AugniH-15-469_G12    | SB | 33 | KF854518 | 0.903 | soil                              | Berthrong et al. 2014          |
| SB24AugniH-2-469_B11     | SB | 74 | EF568533 | 89.2  | Mediterranean Sea                 | Yogev et al. 2011 et al.       |
| SB24AugniH-2-461_B12-2   | SB | 73 | HQ660939 | 94.1  | hypoxic So. Cal Bight             | Kirkpatrick et al, unpublished |
| SB24AugniH-2-474_B12-1   | SB | 12 | KF846589 | 79.6  | soil                              | Berthrong et al. 2014          |
| SB24AugniH-3-469_C11     | SB | 31 | JN638625 | 87.9  | Black Sea                         | Kirkpatrick et al, unpublished |
| SB24AugniH-3-461_C12-1   | SB | 68 | DQ176992 | 90.1  | Mangrove roots                    | Flores-Mirales et al. 2007     |
| SB24AugniH-3-474_C12-2   | SB | 29 | FR695864 | 87.7  | Desulfatibacillum alkenivorans    |                                |
| SB24AugniH-31-461_E04    | SB | 40 | FJ756631 | 87.8  | mid-Atlantic Coastal Ocean        | Mulholland et al., unpublished |
| SB24AugniH-32-461_F04    | SB | 40 | GU193810 | 86.4  | intertidal microbial mat          | Severin & Stal 2010            |
| SB24AugniH-33-461_G04    | SB | 44 | DQ177005 | 84.7  | Mangrove roots                    | Flores-Mirales et al. 2007     |
| SB24AugniH-35-474_B09    | SB | 12 | KF846920 | 89.3  | soil                              | Berthrong et al. 2014          |
| SB24AugniH-39-474_F09    | SB | 29 | HQ130019 | 80.8  | Canadian Arctic Bay               | Blais et al. 2012              |
| SB24AugniH-4-469_D11     | SB | 51 | HQ455892 | 86.2  | South China Sea                   | Kong et al., 2011              |
| SB24AugniH-4-461_D12-1   | SB | 72 | KF854577 | 0.854 | soil                              | Berthrong et al. 2014          |
| SB24AugniH-4-474_D12-2   | SB | 12 | DQ176992 | 80.3  | Mangrove roots                    | Flores-Mirales et al. 2007     |
| SB24AugniH-40-474_G09    | SB | 29 | JX866241 | 88.9  | Desulfovibrio magneticus          |                                |
| SB24AugniH-41-474_H09    | SB | 12 | KF847252 | 88.6  | Desulfovibrio magneticus          |                                |
| SB24AugniH-42-474_A10    | SB | 12 | KF847252 | 89.2  | Desulfovibrio magneticus          |                                |
| SB24AugniH-43-474_B10    | SB | 12 | KF847252 | 89.5  | soil                              | Berthrong et al. 2014          |
| SB24AugniH-5-469_E11     | SB | 56 | KF847145 | 0.894 | soil                              | Berthrong et al. 2014          |
| SB24AugniH-5-461_E12-1   | SB | 71 | JN638623 | 86.2  | Black Sea                         | Kirkpatrick et al, unpublished |
| SB24AugniH-5-474_E12-2   | SB | 12 | JN638704 | 79.2  | Black Sea                         | Kirkpatrick et al, unpublished |
| SB24AugniH-6-461_F12     | SB | 70 | JN638625 | 93.7  | Black Sea                         | Kirkpatrick et al, unpublished |
| SB24AugniH-6-469_F11     | SB | 31 | HQ660939 | 96.4  | hypoxic So. Cal Bight             | Hammersley et al. 2011         |
| SB24AugniH-7-469_G11     | SB | 69 | EF568564 | 86.1  | Mediterranean Sea                 | Mulholland et al., unpublished |
| SB24AugniH-7-461_G12     | SB | 31 | JN638624 | 93.4  | Black Sea                         | Kirkpatrick et al, unpublished |
| SB24AugniH-8-469_H11     | SB | 56 | DQ078033 | 90.1  | oil-contaminated marine sediment  | Musat et al., 2006             |
| SB4-11Oct_0607           | SB | 38 | HF565512 | 86.9  | Desulfomonile tiedjei             |                                |
| SB5-11Oct_0607A          | SB | 57 | KF285321 | 99.1  | Narragansett Bay                  | Brown & Jenkins 2014           |
| SB5-11Oct_0607B          | SB | 38 | HQ456077 | 86.8  | Desulfomonile tiedjei             |                                |
| SB5-11Oct_0607C          | SB | 38 | EU913058 | 77.1  | Amazon forest                     | Mantilla-Paredes et al., 2009  |
| SB5-24Aug_0625A          | SB | 11 | DQ098249 | 85.8  | Chesapeake Bay                    | Zhang et al., unpublished      |
| SB5-24Aug_0625B          | SB | 11 | FJ756590 | 86.9  | mid-Atlantic Coastal Ocean        | Mulholland et al., unpublished |
| SB5-24Aug_0625C          | SB | 11 | JN645381 | 92.1  | Narragansett Bay                  | Fulweiler et al. 2013          |
| SB5-24Aug_0625D          | SB | 11 | FJ756644 | 90.5  | mid-Atlantic Coastal Ocean        | Mulholland et al., unpublished |
| SB5-24Aug_0625E          | SB | 4  | KF847067 | 94    | soil                              | Berthrong et al. 2014          |
| SB5-24Aug_0625F          | SB | 11 | KF847067 | 0.889 | soil                              | Berthrong et al. 2014          |
| SB5-24Aug_0625G          | SB | 4  | KF847067 | 93.9  | soil                              | Berthrong et al. 2014          |
| SB5-24Aug_0625H          | SB | 9  | HM047125 | 99.2  | Bradyrhizobium denitrificans      |                                |
| SB5-24Aug_0625I          | SB | 9  | HM047125 | 99.3  | Bradyrhizobium denitrificans      |                                |
| SB5-24Aug_0625J          | SB | 11 | KF847067 | 93.7  | soil                              | Berthrong et al. 2014          |
| SB5-24Aug_0625K          | SB | 11 | KF847067 | 89.9  | Desulfocapsa sulfexigens          |                                |
| SB5-24Aug_0625L          | SB | 9  | HM047125 | 99.4  | Bradyrhizobium denitrificans      |                                |
| SB6-11Oct_0412A          | SB | 39 | DQ098189 | 91.3  | Desulfocapsa sulfexigens          |                                |
| SB6-11Oct_0412B          | SB | 9  | HM047125 | 98.9  | Bradyrhizobium denitrificans      |                                |
| SB6-11Oct_0412C          | SB | 9  | HM047125 | 98.7  | Bradyrhizobium denitrificans      |                                |
| SB6-11Oct_0703A          | SB | 9  | HM047125 | 99.2  | Bradyrhizobium denitrificans      |                                |
| SB6-11Oct_0703B          | SB | 9  | HM047125 | 99    | Bradyrhizobium denitrificans      |                                |
| SB6-11Oct_0703C          | SB | 39 | DQ098212 | 91.5  | CP003985 Desulfocapsa sulfexigens |                                |
| SB6-11Oct_0704D          | SB | 9  | HM047125 | 98.9  | Bradyrhizobium denitrificans      |                                |
| SB7JulniH-1-52-53_A07    | SB | 3  | JN122948 | 92.2  | Soil Mexico                       | Lopez et al., unpublished      |
| SB7JulniH-1-52-53_A08    | SB | 32 | GU193154 | 94.4  | intertidal microbial mat          | Severin & Stal 2010            |
| SB7JulniH-10-52-53_B08   | SB | 10 | JN122948 | 92.4  | Soil Mexico                       | Lopez et al., unpublished      |
| SB7JulniH-11-52-53_C08   | SB | 3  | AF389780 | 89    | saltmarsh                         | Lovell et al., 2001            |
| SB7JulniH-11-52-53_C08-2 | SB | 3  | KF846704 | 90.6  | soil                              | Berthrong et al. 2014          |
| SB7JulniH-11-52-53_C09   | SB | 45 | DQ177020 | 92.4  | Mangrove roots                    | Flores-Mirales et al. 2007     |

|                           |     |    |          |       |                          |                               |
|---------------------------|-----|----|----------|-------|--------------------------|-------------------------------|
| SB7JulnifH-12-52-53_D08   | SB  | 3  | KF846704 | 81.7  | soil                     | Berthrong et al. 2014         |
| SB7JulnifH-12-52-53_D09   | SB  | 8  | KF846671 | 91.9  | soil                     | Berthrong et al. 2014         |
| SB7JulnifH-13-52-53_E08   | SB  | 45 | GU193072 | 90.8  | intertidal microbial mat | Severin & Stal 2010           |
| SB7JulnifH-13-52-53_E09   | SB  | 24 | GU193093 | 95.4  | intertidal microbial mat | Severin & Stal 2010           |
| SB7JulnifH-14-52-53_F08   | SB  | 3  | AF389780 | 84.7  | saltmarsh                | Lovell et al., 2001           |
| SB7JulnifH-14-52-53_F09   | SB  | 26 | DQ177038 | 90.1  | Mangrove roots           | Flores-Mirales et al. 2007    |
| SB7JulnifH-15-52-53_G08   | SB  | 3  | GU192755 | 94.9  | intertidal microbial mat | Severin & Stal 2010           |
| SB7JulnifH-15-52-53_G08-2 | SB  | 8  | JN122948 | 92.4  | Soil Mexico              | Lopez et al., unpublished     |
| SB7JulnifH-15-52-53_G09   | SB  | 3  | JN122948 | 91.9  | Soil Mexico              | Lopez et al., unpublished     |
| SB7JulnifH-16-52-53_H08   | SB  | 10 | KF846630 | 81.7  | soil                     | Berthrong et al. 2014         |
| SB7JulnifH-16-52-53_H09   | SB  | 28 | KF846904 | 94.2  | soil                     | Berthrong et al. 2014         |
| SB7JulnifH-17-52-53_A09   | SB  | 18 | KF846865 | 94.7  | soil                     | Berthrong et al. 2014         |
| SB7JulnifH-17-52-53_A10   | SB  | 10 | JN122948 | 92.5  | Soil Mexico              | Lopez et al., unpublished     |
| SB7JulnifH-18-52-53_B09   | SB  | 8  | GU193093 | 91.4  | intertidal microbial mat | Severin & Stal 2010           |
| SB7JulnifH-18-52-53_B10   | SB  | 49 | KF854519 | 92.5  | soil                     | Berthrong et al. 2014         |
| SB7JulnifH-19-52-53_C09   | SB  | 28 | KF847126 | 96.9  | soil                     | Berthrong et al. 2014         |
| SB7JulnifH-19-52-53_C09-2 | SB  | 18 | AY224028 | 96.3  | Chesapeake Bay           | Jenkins et al., 2004          |
| SB7JulnifH-19-52-53_C10   | SB  | 3  | JN122948 | 92.4  | Soil Mexico              | Lopez et al., unpublished     |
| SB7JulnifH-2-52-53_B08    | SB  | 26 | DQ177001 | 81.2  | Mangrove roots           | Flores-Mirales et al. 2007    |
| SB7JulnifH-20-52-53_D09   | SB  | 3  | JN122948 | 92.1  | Soil Mexico              | Lopez et al., unpublished     |
| SB7JulnifH-20-52-53_D09-2 | SB  | 24 | GU193792 | 91.6  | intertidal microbial mat | Severin & Stal 2010           |
| SB7JulnifH-20-52-53_D10   | SB  | 26 | Q289582  | 90    | Bradyrhizobium japonicum |                               |
| SB7JulnifH-21-52-53_E09   | SB  | 3  | JF897546 | 89.4  | intertidal microbial mat | Severin & Stal 2010           |
| SB7JulnifH-21-52-53_E09-2 | SB  | 32 | JN122948 | 84.8  | Soil Mexico              | Lopez et al., unpublished     |
| SB7JulnifH-22-52-53_F09   | SB  | 10 | JN122948 | 92.1  | Soil Mexico              | Lopez et al., unpublished     |
| SB7JulnifH-22-52-53_F09-2 | SB  | 10 | FJ395088 | 83.2  | Salt Marsh               | Gamble et al., 2010           |
| SB7JulnifH-23-52-53_G09   | SB  | 26 | GU192755 | 95.6  | intertidal microbial mat | Severin & Stal 2010           |
| SB7JulnifH-23-52-53_G09-2 | SB  | 8  | DQ177038 | 90.1  | Mangrove roots           | Flores-Mirales et al. 2007    |
| SB7JulnifH-24-52-53_H09   | SB  | 28 | KF846865 | 96.7  | soil                     | Berthrong et al. 2014         |
| SB7JulnifH-24-52-53_H09-2 | SB  | 28 | KF846625 | 94.4  | soil                     | Berthrong et al. 2014         |
| SB7JulnifH-25-52-53_A10   | SB  | 10 | FJ686502 | 81.7  | Jiaozhou Bay, China      | Dang et al. 2013              |
| SB7JulnifH-26-52-53_B10   | SB  | 8  | GU192755 | 91.2  | intertidal microbial mat | Severin & Stal 2010           |
| SB7JulnifH-27-52-53_C10   | SB  | 32 | DQ177020 | 95.9  | Mangrove roots           | Flores-Mirales et al. 2007    |
| SB7JulnifH-28-52-53_D10   | SB  | 18 | KF847126 | 97.2  | soil                     | Berthrong et al. 2014         |
| SB7JulnifH-29-52-53_E10   | SB  | 43 | DQ177038 | 90.6  | Mangrove roots           | Flores-Mirales et al. 2007    |
| SB7JulnifH-3-52-53_C08    | SB  | 3  | JN122948 | 92.4  | Soil Mexico              | Lopez et al., unpublished     |
| SB7JulnifH-4-52-53_D08    | SB  | 10 | JN122948 | 92.5  | Soil Mexico              | Lopez et al., unpublished     |
| SB7JulnifH-5-52-53_E07    | SB  | 8  | KF846671 | 95.7  | soil                     | Berthrong et al. 2014         |
| SB7JulnifH-5-52-53_E08    | SB  | 3  | JN122948 | 92.4  | Soil Mexico              | Lopez et al., unpublished     |
| SB7JulnifH-6-52-53_F07    | SB  | 10 | JN122948 | 92.5  | Soil Mexico              | Lopez et al., unpublished     |
| SB7JulnifH-6-52-53_F07-2  | SB  | 3  | KF847181 | 0.825 | soil                     | Berthrong et al. 2014         |
| SB7JulnifH-6-52-53_F08    | SB  | 8  | GU193093 | 95.9  | intertidal microbial mat | Severin & Stal 2010           |
| SB7JulnifH-7-52-53_G07    | SB  | 18 | GU192755 | 95.4  | intertidal microbial mat | Severin & Stal 2010           |
| SB7JulnifH-7-52-53_G07-2  | SB  | 24 | KF846865 | 97.1  | soil                     | Berthrong et al. 2014         |
| SB7JulnifH-7-52-53_G08    | SB  | 10 | HM063802 | 81.6  | Florida Bay              | Olson and Lesser, unpublished |
| SB7JulnifH-8-52-53_H07    | SB  | 43 | GU193093 | 95.6  | intertidal microbial mat | Severin & Stal 2010           |
| SB7JulnifH-8-52-53_H07-2  | SB  | 8  | DQ177005 | 90.6  | Mangrove roots           | Flores-Mirales et al. 2007    |
| SB7JulnifH-8-52-53_H08    | SB  | 24 | GU192755 | 95.6  | intertidal microbial mat | Severin & Stal 2010           |
| SB7JulnifH-9-52-53_A08    | SB  | 8  | GU192755 | 95.9  | intertidal microbial mat | Severin & Stal 2010           |
| SB7JulnifH-9-52-53_A08-2  | SB  | 49 | KF854519 | 0.855 | soil                     | Berthrong et al. 2014         |
| SB7JulnifH-9-52-53_A09    | SB  | 26 | DQ177004 | 81.1  | Mangrove roots           | Flores-Mirales et al. 2007    |
| SB9-7Jul_0412A            | SB  | 18 | KF847132 | 0.947 | soil                     | Berthrong et al. 2014         |
| SB9-7Jul_0412B            | SB  | 18 | KF847126 | 0.944 | soil                     | Berthrong et al. 2014         |
| SLP19-24Aug_0614A         | SLP | 19 | HM750325 | 92.7  | Salt Marsh               | Lovell & Davis 2012           |
| SLP19-24Aug_0614B         | SLP | 19 | HM750325 | 93    | Salt Marsh               | Lovell & Davis 2012           |
| SLP19-24Aug_0614C         | SLP | 19 | HM750325 | 93    | Salt Marsh               | Lovell & Davis 2012           |
| SLP19-24Aug_0614D         | SLP | 19 | HM750325 | 91.7  | Salt Marsh               | Lovell & Davis 2012           |
| SLP19-24Aug_0614E         | SLP | 19 | HM750325 | 92.7  | Salt Marsh               | Lovell & Davis 2012           |
| SLP19-24Aug_0614F         | SLP | 19 | HM750325 | 92.8  | Salt Marsh               | Lovell & Davis 2012           |
| SLP19-24Aug_0614G         | SLP | 19 | HM750325 | 92.8  | Salt Marsh               | Lovell & Davis 2012           |
| SLP24AugnifH-1-364_A02    | SLP | 16 | DQ098254 | 92.5  | Chesapeake Bay           | Zhang et al., unpublished     |
| SLP24AugnifH-10-364_B03   | SLP | 13 | KF854519 | 92.5  | soil                     | Berthrong et al. 2014         |
| SLP24AugnifH-11-364_C03   | SLP | 16 | DQ098254 | 92.8  | Chesapeake Bay           | Zhang et al., unpublished     |
| SLP24AugnifH-12-364_D03   | SLP | 13 | DQ098254 | 92.5  | Chesapeake Bay           | Zhang et al., unpublished     |
| SLP24AugnifH-15-364_G03   | SLP | 13 | DQ098254 | 92.4  | Chesapeake Bay           | Zhang et al., unpublished     |
| SLP24AugnifH-19-364_G01   | SLP | 16 | KF854519 | 92.8  | soil                     | Berthrong et al. 2014         |
| SLP24AugnifH-21-368_A07   | SLP | 14 | KF847167 | 90.7  | Desulfovibrio vulgaris   |                               |
| SLP24AugnifH-22-364_A11   | SLP | 16 | HM750367 | 85.3  | Salt Marsh               | Lovell & Davis 2012           |
| SLP24AugnifH-23-368_C07   | SLP | 30 | HM601494 | 90.9  | Desulfovibrio vulgaris   |                               |
| SLP24AugnifH-24-364_C11   | SLP | 16 | KF847073 | 93    | Chesapeake Bay           | Zhang et al., unpublished     |
| SLP24AugnifH-24-368_D07   | SLP | 30 | DQ098254 | 90.9  | Desulfovibrio vulgaris   |                               |
| SLP24AugnifH-25-364_D11   | SLP | 13 | DQ098254 | 85.1  | Chesapeake Bay           | Zhang et al., unpublished     |
| SLP24AugnifH-26-364_E11   | SLP | 13 | DQ098254 | 92.7  | Chesapeake Bay           | Zhang et al., unpublished     |

|                           |     |    |          |      |                                  |                            |
|---------------------------|-----|----|----------|------|----------------------------------|----------------------------|
| SLP24AugnifH-26-368_F07   | SLP | 54 | FJ686519 | 84.6 | Desulfobacter curvatus           |                            |
| SLP24AugnifH-27-368_G07   | SLP | 14 | KF847073 | 90.6 | Desulfovibrio vulgaris           |                            |
| SLP24AugnifH-28-364_G11   | SLP | 64 | CP007201 | 92.5 | Sulfurospirillum multivorans     |                            |
| SLP24AugnifH-28-368_H07   | SLP | 14 | KF847073 | 90.9 | Desulfovibrio vulgaris           |                            |
| SLP24AugnifH-29-368_A08   | SLP | 16 | KF847073 | 91   | Desulfovibrio vulgaris           |                            |
| SLP24AugnifH-29-364_H11   | SLP | 14 | GU193805 | 86.1 | intertidal microbial mat         | Severin & Stal 2010        |
| SLP24AugnifH-3-364_C02    | SLP | 13 | DQ098254 | 93   | Chesapeake Bay                   | Zhang et al., unpublished  |
| SLP24AugnifH-30-52&53_A12 | SLP | 16 | DQ098254 | 92.7 | Chesapeake Bay                   | Zhang et al., unpublished  |
| SLP24AugnifH-31-368_C08   | SLP | 14 | DQ098243 | 90.7 | Desulfovibrio vulgaris           |                            |
| SLP24AugnifH-32-368_D08   | SLP | 14 | KF846986 | 90.6 | Desulfovibrio vulgaris           |                            |
| SLP24AugnifH-33-368_E08   | SLP | 14 | KF847167 | 91   | Desulfovibrio vulgaris           |                            |
| SLP24AugnifH-34-368_F08   | SLP | 30 | JN122948 | 90.6 | Desulfovibrio vulgaris           |                            |
| SLP24AugnifH-35-368_G08   | SLP | 30 | KF847167 | 90.9 | Desulfovibrio vulgaris           |                            |
| SLP24AugnifH-36-368_H08   | SLP | 54 | FJ686519 | 89.1 | Jiaozhou Bay, China              | Dang et al., 2013          |
| SLP24AugnifH-37-368_E06   | SLP | 14 | KF847073 | 91   | Desulfovibrio vulgaris           |                            |
| SLP24AugnifH-39-368_G06   | SLP | 52 | DQ177038 | 89.2 | Mangrove roots                   | Flores-Mirales et al. 2007 |
| SLP24AugnifH-4-364_D02    | SLP | 13 | DQ098254 | 92.3 | Chesapeake Bay                   | Zhang et al., unpublished  |
| SLP24AugnifH-40-368_H06   | SLP | 52 | DQ177038 | 78.5 | Mangrove roots                   | Flores-Mirales et al. 2007 |
| SLP24AugnifH-42-367_B04   | SLP | 63 | HM063804 | 87.6 | South China Sea                  | Kong et al., 2011          |
| SLP24AugnifH-44-367_D04   | SLP | 44 | CP001087 | 90.5 | cave                             | Desai et al., 2013         |
| SLP24AugnifH-45-367_E04   | SLP | 35 | HF565511 | 84.9 | Desulfobacter latus              |                            |
| SLP24AugnifH-46-367_F04   | SLP | 36 | HM063804 | 91.1 | cave                             | Desai et al., 2013         |
| SLP24AugnifH-47-367_G04   | SLP | 34 | HF565512 | 80.8 | cave                             | Desai et al., 2013         |
| SLP24AugnifH-53-367_E05   | SLP | 35 | HF565511 | 83.3 | cave                             | Desai et al., 2013         |
| SLP24AugnifH-55-367_G05   | SLP | 35 | HF565511 | 91.1 | cave                             | Desai et al., 2013         |
| SLP24AugnifH-57-367_A06   | SLP | 61 | FN813564 | 99.7 | Pseudomonas stutzeri             |                            |
| SLP24AugnifH-58-367_B06   | SLP | 60 | HM063804 | 93.9 | South China Sea                  | Kong et al., 2011          |
| SLP24AugnifH-6-364_F02    | SLP | 27 | CP001999 | 86.1 | Arcobacter nitrofigilis          |                            |
| SLP24AugnifH-7-364_G02    | SLP | 13 | DQ098254 | 92.7 | Chesapeake Bay                   | Zhang et al., unpublished  |
| SLP29JulnifH-1-217_A10    | SLP | 1  | DQ098249 | 93.6 | Chesapeake Bay                   | Zhang et al., unpublished  |
| SLP29JulnifH-10-217_B11   | SLP | 1  | GU193076 | 93.5 | intertidal microbial mat         | Severin & Stal 2010        |
| SLP29JulnifH-11-217_C11   | SLP | 2  | DQ098249 | 93.6 | Chesapeake Bay                   | Zhang et al., unpublished  |
| SLP29JulnifH-12-217_D11   | SLP | 2  | GU193076 | 86.9 | intertidal microbial mat         | Severin & Stal 2010        |
| SLP29JulnifH-13-217_E11   | SLP | 2  | GU193579 | 93.2 | intertidal microbial mat         | Severin & Stal 2010        |
| SLP29JulnifH-14-217_F11   | SLP | 1  | JN645429 | 93.5 | Narragansett Bay                 | Fulweiler et al. 2013      |
| SLP29JulnifH-16-217_H11   | SLP | 2  | JN645429 | 91.4 | Narragansett Bay                 | Fulweiler et al. 2013      |
| SLP29JulnifH-17-217_A12   | SLP | 1  | KF846820 | 93   | soil                             | Berthrong et al. 2014      |
| SLP29JulnifH-19-217_C12   | SLP | 1  | DQ098249 | 93.6 | Chesapeake Bay                   | Zhang et al., unpublished  |
| SLP29JulnifH-2-217_B10    | SLP | 1  | KF846820 | 87.5 | soil                             | Berthrong et al. 2014      |
| SLP29JulnifH-2-217_C01    | SLP | 2  | GU193076 | 93.4 | intertidal microbial mat         | Severin & Stal 2010        |
| SLP29JulnifH-20-217_D12   | SLP | 1  | GU193836 | 87.2 | intertidal microbial mat         | Severin & Stal 2010        |
| SLP29JulnifH-21-217_E12   | SLP | 1  | GU193579 | 86.9 | intertidal microbial mat         | Severin & Stal 2010        |
| SLP29JulnifH-22-217_F12   | SLP | 2  | DQ098249 | 93.8 | Chesapeake Bay                   | Zhang et al., unpublished  |
| SLP29JulnifH-23-217_G12   | SLP | 2  | GU193579 | 93.5 | intertidal microbial mat         | Severin & Stal 2010        |
| SLP29JulnifH-25-217_F09   | SLP | 1  | GU193842 | 87.7 | intertidal microbial mat         | Severin & Stal 2010        |
| SLP29JulnifH-3-217_C10    | SLP | 2  | GU193579 | 93.3 | intertidal microbial mat         | Severin & Stal 2010        |
| SLP29JulnifH-3-217_D01    | SLP | 2  | GU193842 | 93.5 | intertidal microbial mat         | Severin & Stal 2010        |
| SLP29JulnifH-4-217_D10    | SLP | 2  | JN645381 | 90.9 | Narragansett Bay                 | Fulweiler et al. 2013      |
| SLP29JulnifH-4-217_E01    | SLP | 1  | GU193152 | 87.5 | intertidal microbial mat         | Severin & Stal 2010        |
| SLP29JulnifH-5-217_E10    | SLP | 1  | JN645381 | 91.4 | Narragansett Bay                 | Fulweiler et al. 2013      |
| SLP29JulnifH-6-217_F10    | SLP | 1  | JN645380 | 91.1 | Narragansett Bay                 | Fulweiler et al. 2013      |
| SLP29JulnifH-6-217_G01    | SLP | 2  | GU193152 | 93.5 | intertidal microbial mat         | Severin & Stal 2010        |
| SLP29JulnifH-7-217_G10    | SLP | 1  | JN645381 | 93.3 | Narragansett Bay                 | Fulweiler et al. 2013      |
| SLP29JulnifH-8-217_H10    | SLP | 1  | GU193076 | 93.8 | intertidal microbial mat         | Severin & Stal 2010        |
| SLP29JulnifH-9-217_A11    | SLP | 1  | DQ098249 | 93.6 | Chesapeake Bay                   | Zhang et al., unpublished  |
| SLP8-24Aug_0412A          | SLP | 66 | JX268325 | 82.6 | Rice paddy                       | Bei et al., 2103           |
| SLP8-24Aug_0412B          | SLP | 9  | CP000494 | 99.2 | Bradyrhizobium sp.               |                            |
| SLP8-24Aug_0625A          | SLP | 6  | GU193072 | 95.3 | intertidal microbial mat         | Severin & Stal 2010        |
| SLP8-24Aug_0625B          | SLP | 5  | FJ686527 | 91.9 | Desulfovibrio vulgaris           |                            |
| SLP8-24Aug_0625C          | SLP | 5  | FJ686527 | 92.1 | Desulfovibrio vulgaris           |                            |
| SLP8-24Aug_0703A          | SLP | 5  | FJ686527 | 92.1 | Desulfovibrio vulgaris           |                            |
| SLP8-24Aug_0703B          | SLP | 5  | FJ686527 | 92.1 | Desulfovibrio vulgaris           |                            |
| SLP8-24Aug_0703D          | SLP | 5  | FJ686527 | 91.8 | Desulfovibrio vulgaris           |                            |
| SLP8-24Aug_0703G          | SLP | 5  | KF861215 | 92.2 | Desulfovibrio vulgaris           |                            |
| SLP8-24Aug_0703H          | SLP | 5  | JX866366 | 92.1 | Desulfovibrio vulgaris           |                            |
| SLP8-24Aug_0703J          | SLP | 5  | AE017286 | 85.3 | Desulfovibrio vulgaris           |                            |
| SLP8-24Aug_0703L          | SLP | 5  | HM750649 | 91.9 | Desulfovibrio vulgaris           |                            |
| SLP8-24Aug_0703M          | SLP | 5  | FJ686498 | 91.9 | Desulfovibrio vulgaris           |                            |
| SLP8-29Jul_0412C          | SLP | 55 | KC243670 | 99.2 | Calothrix sp.                    |                            |
| SLP8-29Jul_0607           | SLP | 55 | KC243670 | 98.9 | Calothrix sp.                    |                            |
| SLP8-29Jul_0625A          | SLP | 6  | GU192793 | 95.4 | intertidal microbial mat         | Severin & Stal 2010        |
| SLP8-29Jul_0625B          | SLP | 6  | GU193045 | 90.3 | intertidal microbial mat         | Severin & Stal 2010        |
| SLP8-29Jul_0625C          | SLP | 6  | GU193045 | 95.6 | intertidal microbial mat         | Severin & Stal 2010        |
| SLP8-29Jul_0625D          | SLP | 6  | CP007031 | 90.5 | Marichromatium purpuratum        |                            |
| SLP8-29Jul_0625E          | SLP | 6  | GU193045 | 95.4 | intertidal microbial mat         | Severin & Stal 2010        |
| SLP8-29Jul_0625F          | SLP | 6  | CP007031 | 95.1 | Marichromatium purpuratum        |                            |
| SLP8-29Jul_0625G          | SLP | 6  | DQ078016 | 90.6 | oil-contaminated marine sediment |                            |
| SLP8-29Jul_0625H          | SLP | 6  | GU192793 | 90.9 | intertidal microbial mat         | Severin & Stal 2010        |
| SLP8-29Jul_0625I          | SLP | 6  | KC256769 | 90.3 | Pseudanabaena cf.                |                            |
